# Supplementary material for: 学术金针度与人
Source: Atypon-hosted journal article supplement (doi:10.1142/g349), 2015-07-01
Supplement: g349_foreword_free.pdf [file g349_foreword_free.pdf]

# 序

## 学术金针度与人

◎衣若芬

禅家有言：“鸳鸯绣了从君看，莫把金针度与人。”意谓机妙玄理当由人自悟，不宜道破。这句话被朱熹用以论道；被金代的元好问用以论诗，近人则理解为将独门工夫藏私的意思，与原意有所出入，而推崇“金针度人”，造福大众。

在网络发达，数据海量的时代，我们得以轻易获取丰富的讯息资源，智能教育也不再限于校园课堂，不吝于散播的“网民”早就“金针度人”无数了。然而，网际之间的无数“度人”，传递的可是“金针”？还是糟粕？甚或是伪知识？因此，培养分析、选择和判断的能力，应该是当前高等教育的重点。我们在鼓励“学无止尽”之余，还必须强调思辨之不可偏废，也就是实践孔子“学而不思则罔，思而不学则殆”的精神，这是我们主办“学与思：国际汉学研讨会”的初衷，希望邀请学术专精又具有典范地位的研究者来谈论他们的学习经验和人生体悟。

2014年7月19日和20日，来自美国、日本、韩国、中国大陆、香港、台湾和新加坡的十五位学者聚会于南洋理工大学，分别阐述了各自的学思历程。这是一次难得的盛会，有别于集中探讨某一个具体的学术议题，针对议题展开论辩，“学与思”呈现的是十五个“成为学者”的故事。这十五个现身说法的故事，让我们

看到不同的研究取径与殊途同归的人文关怀。我想，这对所有步上学术研究道路的后生晚辈，以及一般社会人士都是很有意义的。会议全程免费开放，报名的情形出乎意料地热烈，我们预订的会场，从容纳50人换成容纳70人，再换到容纳一百多人，三易场地的现象，也显示了本地公众的求知如渴。

为了帮助大家认识发言的十五位学者，我们和南洋理工大学中文图书馆合作，举行“学与思：国际汉学家签名本暨善本书特展”，展出学者的简介、赠送给中文图书馆的签名著作，以及“镇馆之宝”——任九皋先生捐赠，清康熙五十五年(1716年)内府官刻的武英殿本《康熙字典》。同时，我们也请学者们提供各自的座右铭让大家参考学习。感谢中文图书馆同仁的鼎力协助，阮阳主任特地撰文记叙展览的筹备过程、对学者座右铭的心得，以及与学者交流感想，是最好的纪念。阮主任提及的拙文，有关中文图书馆典藏的《康熙字典》的考察，附录于本书之末，以供读者参阅。

会议用了“汉学”(Sinology)这个现今似乎有些陈旧的名词，我也没有刻意定义“汉学”的指涉范围，我知道近年在中国大陆“汉学主义”与“国学主义”、“中国研究”(Chinese Studies)的立场、方法论、知识论等等有着见仁见智的笔战，此前我写过一篇小文〈国学，汉学，中国学，华学〉做过基本的梳理，该文也附在本书之末，此不赘言。我想补充的是，在人员流动与学术往来都比过去频密的21世纪，“全球化”的结果已经渗入学术研究，以地理位置、时间空间、国籍种族等等画分归类的方式来规范学术研究，势必造成更多的质疑。看来陈旧的“汉学”一词，可能反而更由于笼统而具有包容性。

会议期间，南洋理工大学中文系的研究生和博士后研究员访谈了十五位学者，写成侧记。本书依会议议程的顺序编排学者的访谈稿、发言摘要和中英文简介。我的博士论文指导教授曾永义老师做大会主题演讲，这是曾老师荣膺中央研究院院士之后的海内外第一场公开讲座。曾老师在俗文学和戏曲研究有开拓之功，

嘉惠后学，俗文学和戏曲研究也由于曾老师的坚持努力，终于在学术界占有一席之地。中央研究院院士的荣衔，不仅是对曾老师卓越学术贡献的推崇，也是对人文学科开创新局的肯定。

和曾永义教授一样，受邀发言的十五位学者无一不是在个别的学术领域里以过往湮没或不彰的新材料、新方法、新视角、新思维来破旧立说。

艾朗诺(Ronald Egan)教授和大木康教授用流畅的中文发言，引发现场听众的感叹，他们呈现扎实的作家作品个案研究，是所有学术研究者的榜样。

来自北京和南京两大古都的安平秋教授和张伯伟教授都对“汉籍”的搜集、整理、研究颇有资历。安教授着力于海外中国汉籍的回归；张教授则开辟东亚汉籍研究的新学科。

李爽学教授和廖肇亨教授都来自中央研究院中国文哲研究所，也都从事文学与宗教交涉会通的研究。李教授重在西方的天主教；廖教授则重在东方的佛教，各有千秋。

金文京教授和陈国球教授谈的是文学史的叙事与抒情传统，都带着比较文学的观点，但着眼点不同。

李焯然教授和我同一场，都是从学术与人生出发，李教授谈许地山；我则自剖摸索建构“文图学”研究的想法。

胡晓真教授和许敬震教授都关心“域外”、“边缘”与“中央”的问题。胡教授谈西南少数民族传奇；许教授谈东北亚文化交流。

压轴的两位学者都研究新加坡，王力坚教授讨论新加坡客家社团；柯思仁教授拓展剧场研究的方向。

整个会议的“汉学”研究从古代延伸到现当代；从中国人写作的文本，到东北亚、东南亚的汉字文本。柯教授本科毕业于台湾大学，受过传统的学院训练，后来回国投身戏剧编导和研究，也和会议初始曾永义教授的主题演讲相互辉映。

这样的会议组织结构仿佛“天作之合”，其实是我认真听完全部的演讲之后才发现。我也是在读完十五篇访谈稿之后，才

发现每一位学者都感念教导过自己的恩师，在学术的传承脉络里自许青出于蓝。至于他们别有滋味的人生境遇，请读者们透过侧写，逐一品会。

本书附录介绍会议的三个主办单位，其中中央研究院中国文哲研究所是我的老东家，慷慨襄助，情深意重。“台湾文化光点计画”是台湾企业家尹衍樑先生的捐款，我担任南洋理工大学“台湾文化光点计画”的主持人。南洋理工大学人文与社会科学研究中心提供经费与行政的支持。驻新加坡台北代表处赞助本书出版，谨此一併致谢。

还要感谢曾经为“学与思：国际汉学研讨会”辛勤付出的每一位工作人员，本书附录了工作小组的名单，大家几乎都是在新加坡第一次操办如此规模的国际学术研讨会，从生疏中学习。尤其感谢本书的执行编辑蔡佳敏小姐，佳敏从大学本科开始随我写毕业论文，毕业后直接申请读硕士班，本次会议担任执行秘书，既要忙于会务，还得写作学位论文。很高兴佳敏如今顺利取得硕士学位，在社会继续为传承华文薪火而尽心尽力。

学术金针度与人，无论您是否从事学术研究，本书的十五个学者故事将帮助您一同想想“生而为人”的使命，以及如何发挥生命的最高价值。

——序于2015年清明节深夜
