# Supplementary material for: 学术金针度与人
Source: Atypon-hosted journal article supplement (doi:10.1142/g349), 2015-07-01
Supplement: g349_toc_free.pdf [file g349_toc_free.pdf]

## 目录

- xiii 序 学术金针度与人  
◎衣若芬
- 1 如何治学，怎样为人？  
访著名戏曲学家、民俗学家曾永义先生有感  
◎阮阳
- 9 人弃我取，愉快人间  
访著名戏曲学家、民俗学家曾永义先生  
◎王思扬
- 25 追叙艾朗诺教授的学术旅程  
◎杨明慧
- 39 因趣为学，为学至精  
记日本汉学家大木康教授  
◎关天辰
- 49 《史记》研究、古籍整理和汉籍回归  
安平秋教授侧记  
◎张森林
- 61 访问张伯伟老师  
◎张嘉嘉

- 69 站在东西文学的交汇口  
李爽学先生访谈  
◎曲晓雷
- 77 “读经须解义，解义即修行”  
与廖肇亨博士畅谈其学思历程及学问之道  
◎洪耀通
- 91 钻研《三国志》，观照中日韩  
金文京教授侧记  
◎张森林
- 105 “文学是抵抗黑暗之光，且让文学来安顿我们的心灵”  
与陈国球教授畅谈其学思历程  
◎林鼎瀚
- 117 历史与思想穹谷的学术人生  
专访李焯然教授  
◎林科宏
- 131 游目骋怀：从二十五度北纬至赤道零度  
访衣若芬教授  
◎贺淑芳
- 141 边缘的叙事与社群  
胡晓真教授的文学研究理念  
◎黄子明
- 153 法古创新，继往开来  
访许敬震教授谈比较文学研究  
◎蔡佳敏
- 163 王力坚教授访谈  
◎刘琳娜
- 169 边界思维  
追溯柯思仁教授的学与思  
◎张英豪

## 附录

- 179 本书作者群简介
- 184 学与思：国际汉学研讨会议程
- 187 会议工作组
- 188 会议主办单位简介
- 195 国学，汉学，中国学，华学  
◎衣若芬
- 199 有些书不是拿来读的  
◎衣若芬
